# Supplementary material
Source: PubMed Central journal article supplement (PMC6072569)
Supplement: NIHMS971462-supplement-1.pdf [file NIHMS971462-supplement-1.pdf]

**Supplementary Figure S1**

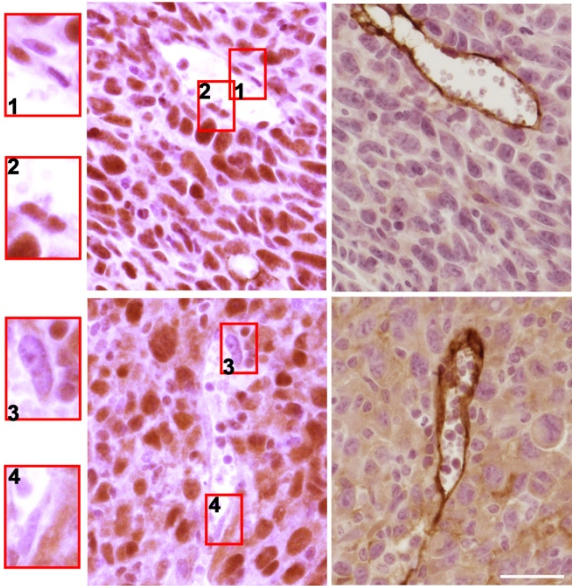

**Supplementary Figure S1. Tamoxifen-induced loss of EYA3 protein in the tumor vasculature of *Eya3*<sup>VEC-KO</sup> mice.** Serial sections from LLC xenografts in *Eya3*<sup>fl/fl</sup> and *Eya3*<sup>VEC-KO</sup> mice stained with CD31 and EYA3. Magnified sections in red boxes labeled 1, 2, 3, 4. Endothelial cells indicated by arrowheads. Scale bar 50  $\mu$ m.
