# Supplementary material
Source: PubMed Central journal article supplement (PMC6072569)
Supplement: NIHMS971462-supplement-2.pdf [file NIHMS971462-supplement-2.pdf]

## Supplementary Figure S2

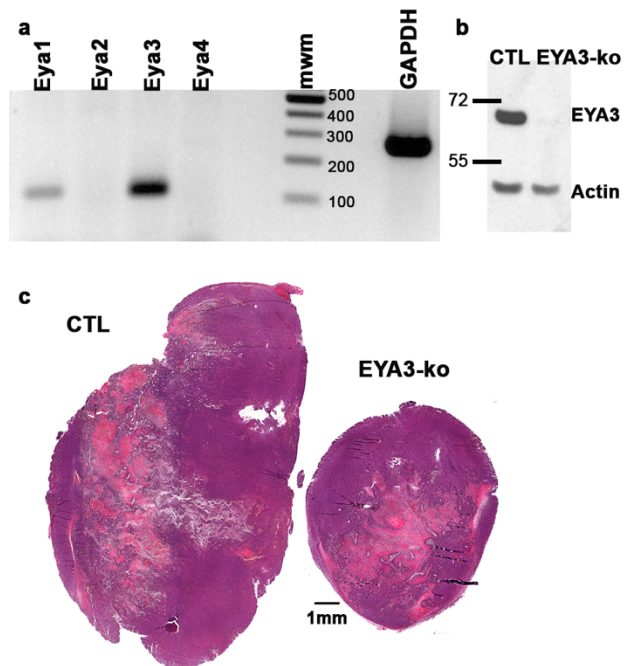

### Supplementary Figure S2. Loss of EYA3 in LLC cells leads to reduced tumor growth.

- RT-PCR analysis on mRNA isolated from LLC cells.** Products after 25 cycles were run on a 1.5% agarose gel. Expected bands were 109 bp for *Eya1*, 85 bp for *Eya2*, 107 bp for *Eya3*, 237 bp for *Eya4*, and 281 bp for GAPDH (control). Only *Eya3* transcript was detected. 100 base-pair molecular weight marker is shown.
- Western blot showing reduced EYA3 protein levels in CRISPR-Cas9 edited LLC cells.** Quantitation of bands normalized to the load control shows >80% reduction in EYA3 levels.
- Representative hematoxylin and eosin staining of CTL (LLC) and EYA3-ko tumors.**
