# Supplementary material
Source: PubMed Central journal article supplement (PMC6072569)
Supplement: NIHMS971462-supplement-3.pdf [file NIHMS971462-supplement-3.pdf]

### Supplementary Figure S3

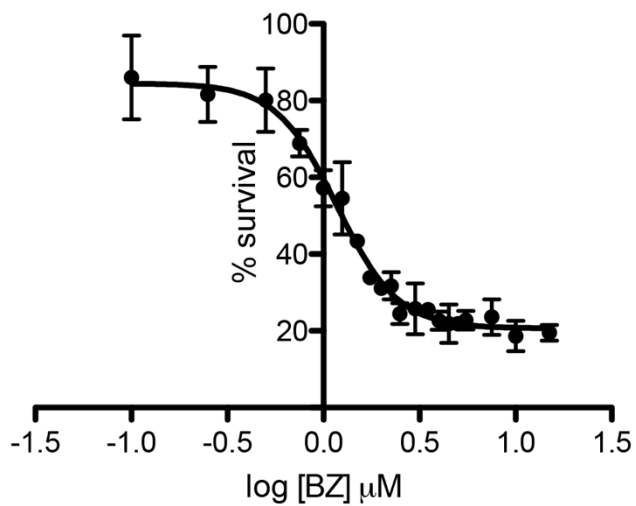

**Supplementary Figure S3. BZ cytotoxicity assay.** The WST-8 cytotoxicity assay was conducted on LLC cells after incubation with BZ at the indicated doses for 72 hours. Standard deviations over 3 readings are indicated by the error bars. IC50 value was calculated using nonlinear regression analysis in PRISM® (Graphpad Software, La Jolla CA).
