# Supplementary material
Source: PubMed Central journal article supplement (PMC6072569)
Supplement: NIHMS971462-supplement-4.pdf [file NIHMS971462-supplement-4.pdf]

**Supplementary Figure S4**

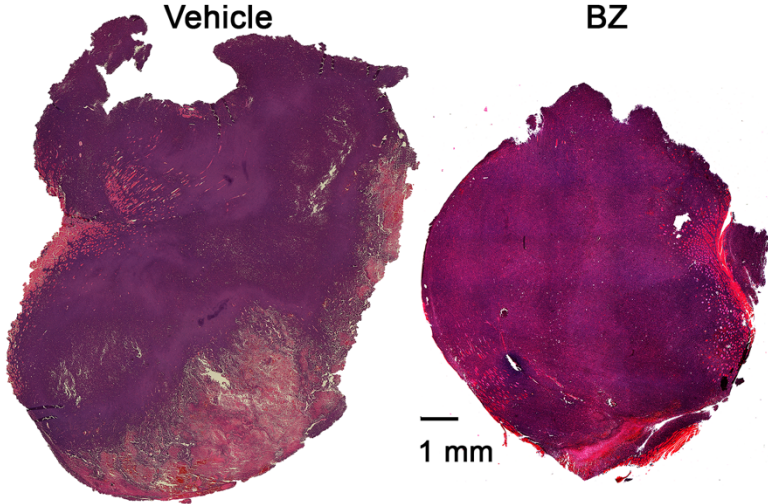

**Supplementary Figure S4. Representative hematoxylin and eosin staining of vehicle and BZ treated LLC tumors.**
